# Supplementary material for: Metabolomics study of the anti-inflammatory effects of endogenous omega-3 polyunsaturated fatty acids
Source: PubMed Central journal article supplement — RSC Adv. 2019 Dec 17;9(71):41903–12. doi: 10.1039/c9ra08356a (PMC9076520; doi:10.1039/c9ra08356a), 2019-12-17
Supplement: RA-009-C9RA08356A-s001.pdf [file RA-009-C9RA08356A-s001.pdf]

### Validation of untargeted metabolomics method

A pooled QC representing “mean” sample containing all analytes was used to monitor the stability and repeatability of the analytical methods. The QC sample was run three times at the beginning of analysis to ensure instrument equilibration, and then one every ten tested samples. The robustness test was conducted using the relative peak intensity (RPI) and relative retention time (RRT) to evaluate the anti-interference performance of the analytic method [1]. As shown in Table S1 and Table S2, eight representative peaks in the entire ion chromatogram were selected to calculate the RSD values of the RPI and RRT. These results revealed that the RSD values were all less than 3.0 %, indicating that the established LC-MS method was stable enough to perform the analysis.

Additionally, the QC datasets were also analyzed by PCA to assess the system stability and repeatability. The QC sample sets were found to be clustered in the center and segregated in a tight cluster in the PCA score plots in either positive or negative ionization mode (Supplementary Figure S1 and Figure S2). These data indicated that the developed LC-MS method was robust with excellent repeatability and stability, and could be utilized in metabolomics study.

Table S1 Reproducibility of retention time in QC sample in the metabolomics study

| No. | Retention time (min) |        |        |        |        |        |        |        |
|-----|----------------------|--------|--------|--------|--------|--------|--------|--------|
|     | Peak 1               | Peak 2 | Peak 3 | Peak 4 | Peak 5 | Peak 6 | Peak 7 | Peak 8 |

|            |      |      |      |      |      |       |       |       |
|------------|------|------|------|------|------|-------|-------|-------|
| 1          | 1.79 | 3.21 | 4.85 | 7.26 | 9.00 | 10.01 | 12.75 | 15.08 |
| 2          | 1.79 | 1.79 | 4.85 | 7.26 | 8.99 | 10.01 | 12.75 | 15.08 |
| 3          | 1.79 | 1.79 | 4.85 | 7.26 | 8.99 | 10.01 | 12.75 | 15.08 |
| 4          | 1.79 | 1.79 | 4.85 | 7.26 | 8.99 | 10.01 | 12.75 | 15.08 |
| 5          | 1.79 | 1.79 | 4.85 | 7.26 | 8.99 | 10.01 | 12.75 | 15.08 |
| 6          | 1.79 | 1.79 | 4.85 | 7.26 | 8.99 | 10.01 | 12.75 | 15.08 |
| RSD<br>(%) | 0    | 0    | 0    | 0    | 0.05 | 0     | 0     | 0     |

Table S2Reproducibility of area in QC sample in the metabolomics study

| No.        | Retention time (min) |        |        |        |        |        |        |        |
|------------|----------------------|--------|--------|--------|--------|--------|--------|--------|
|            | Peak 1               | Peak 2 | Peak 3 | Peak 4 | Peak 5 | Peak 6 | Peak 7 | Peak 8 |
| 1          | 53272                | 59205  | 380331 | 127880 | 226907 | 367832 | 169828 | 16882  |
| 2          | 51507                | 56820  | 368869 | 122688 | 226926 | 368099 | 168832 | 16294  |
| 3          | 51529                | 57642  | 371919 | 129263 | 222728 | 365857 | 168350 | 16614  |
| 4          | 50614                | 56113  | 369324 | 121524 | 220153 | 363364 | 160017 | 16785  |
| 5          | 51756                | 57229  | 364161 | 125141 | 223075 | 364146 | 165580 | 16780  |
| 6          | 52821                | 59923  | 388707 | 129262 | 228828 | 369339 | 169339 | 16861  |
| RSD<br>(%) | 1.87                 | 2.52   | 2.42   | 2.68   | 1.47   | 0.69   | 2.26   | 1.33   |

Table S3 Calibration curve in the targeted metabolomics study

| Compound              | unit  | LOD | S/N | range  |
|-----------------------|-------|-----|-----|--------|
| Uric acid             | ug/mL | 0.5 | 10  | 0.5~50 |
| pc16                  | ug/mL | 0.5 | 10  | 0.5~50 |
| Eicosapentaenoic acid | ug/mL | 0.2 | 10  | 0.2~20 |
| Prostaglandin E2      | ug/mL | 0.1 | 10  | 0.1~10 |
| Arachidonic acid      | ug/mL | 0.5 | 10  | 0.5~50 |
| Palmitic acid         | ug/mL | 0.5 | 10  | 0.5~50 |
| RvE1                  | ng/mL | 0.1 | 3   | 0.1~10 |
| 5-HETE                | ng/mL | 0.1 | 3   | 0.1~10 |

[1] Y. Peng, F. Zhang, H. Tao, W. Wang, L. Sun, W. Chen, C. Wang, Simultaneous determination of multiple platycosides with a single reference standard in Platycodi Radix by high-performance liquid chromatography coupled with evaporative light scattering detection, J Sep Sci, 38 (2015) 3712-3719.

## Supplementary figure legends

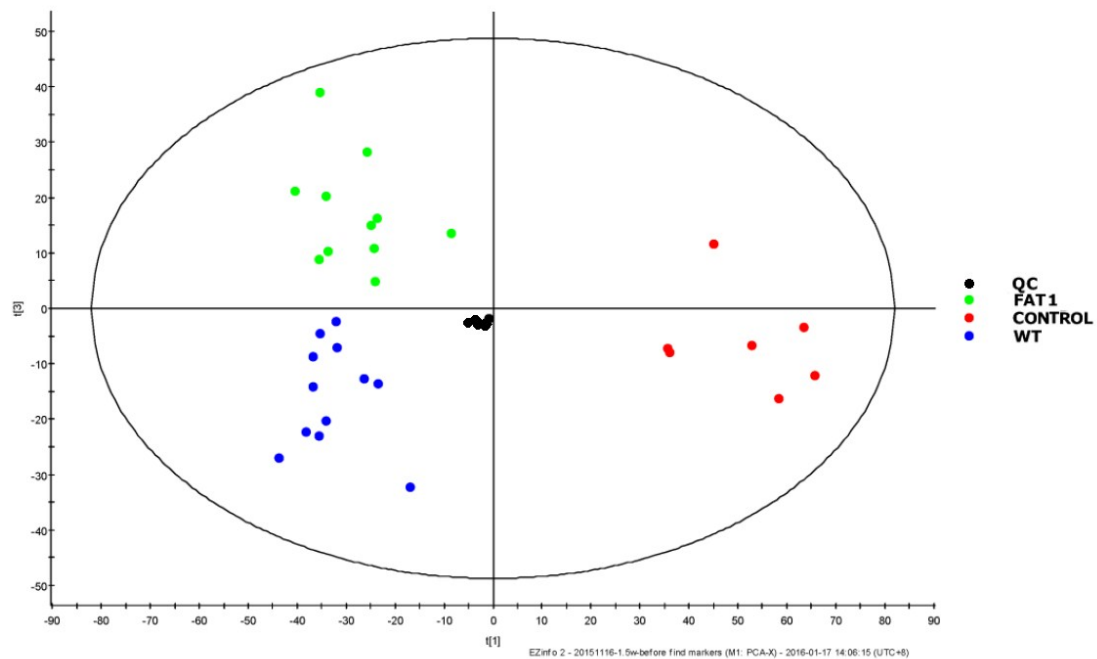

Figure S1. Score plots in PCA statistic of method validation with QC in the positive electrospray ionization mode

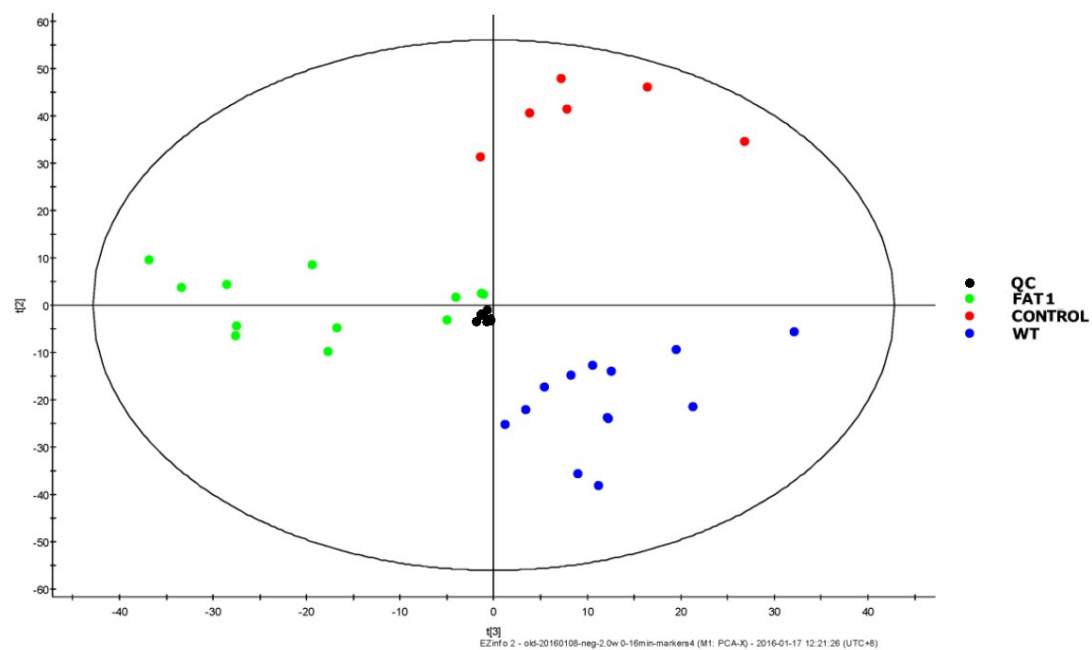

Figure S2. Score plots in PCA statistic of method validation with QC in the negative electrospray ionization mode

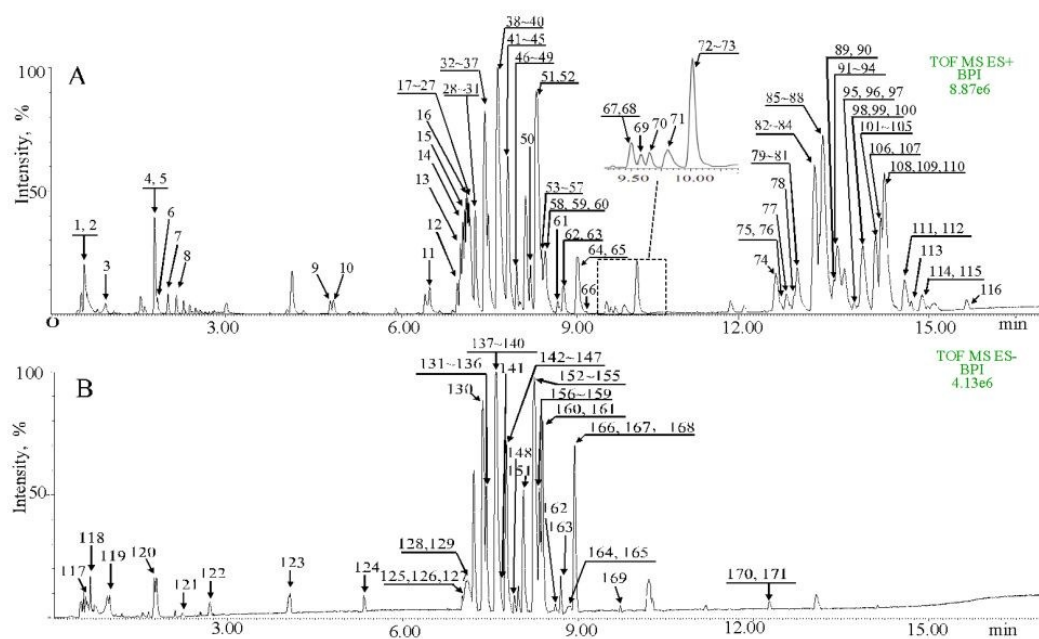

Figure S3. The Chromatogram of QC samples in the ESI positive mode and negative mode. The features with VIP more than one in Chromatogram were numbered and marked.
